# Supplementary material
Source: publisher figshare collection journal article supplement (https://springernature.figshare.com/articles/dataset/_/9636983)
Supplement: Supplementary file 1 [file 1]

|                   | Random sequence generation (selection bias) | Allocation concealment (selection bias) | Blinding of participants and personnel (performance bias) | Blinding of outcome assessment (detection bias) | Incomplete outcome data (attrition bias) | Selective reporting (reporting bias) | Other bias |
|-------------------|---------------------------------------------|-----------------------------------------|-----------------------------------------------------------|-------------------------------------------------|------------------------------------------|--------------------------------------|------------|
| Bourliere 2017    | +                                           | +                                       | +                                                         | +                                               | +                                        | +                                    | +          |
| Chayama 2017      | -                                           | -                                       | +                                                         | +                                               | +                                        | +                                    | +          |
| de Ledinghen 2017 | +                                           | +                                       | +                                                         | +                                               | +                                        | +                                    | +          |
| Dore 2016         | +                                           | +                                       | +                                                         | +                                               | +                                        | +                                    | +          |
| Esmat 2017        | +                                           | +                                       | +                                                         | +                                               | +                                        | +                                    | +          |
| Foster 2018       | +                                           | +                                       | +                                                         | +                                               | +                                        | +                                    | +          |
| Gane 2015         | +                                           | +                                       | +                                                         | +                                               | +                                        | +                                    | +          |
| Hezode 2015       | +                                           | +                                       | +                                                         | +                                               | +                                        | +                                    | +          |
| Kowdley 2014      | +                                           | +                                       | +                                                         | +                                               | +                                        | +                                    | +          |
| Lau 2016          | +                                           | +                                       | +                                                         | +                                               | +                                        | +                                    | +          |
| Lawitz 2014       | +                                           | +                                       | +                                                         | +                                               | +                                        | +                                    | +          |
| Lawitz 2017a      | +                                           | +                                       | +                                                         | +                                               | +                                        | +                                    | +          |
| Lawitz 2017b      | ?                                           | ?                                       | +                                                         | +                                               | +                                        | +                                    | +          |
| Ovrehus 2017      | +                                           | +                                       | +                                                         | +                                               | +                                        | +                                    | -          |
| Poordad 2018      | ?                                           | ?                                       | +                                                         | +                                               | +                                        | +                                    | +          |
| Shiha 2018        | ?                                           | ?                                       | +                                                         | +                                               | +                                        | +                                    | +          |
| Sulkowski 2014    | +                                           | +                                       | +                                                         | +                                               | +                                        | +                                    | +          |
| Sulkowski 2015    | +                                           | +                                       | +                                                         | +                                               | +                                        | +                                    | -          |
| Sulkowski 2017b   | +                                           | +                                       | +                                                         | +                                               | +                                        | +                                    | +          |
| Tam 2018          | +                                           | +                                       | +                                                         | +                                               | +                                        | +                                    | +          |
| Waked 2016        | +                                           | +                                       | +                                                         | +                                               | +                                        | +                                    | +          |
| Wyles 2015        | +                                           | +                                       | +                                                         | +                                               | +                                        | +                                    | +          |
| Wyles 2018        | ?                                           | ?                                       | +                                                         | +                                               | +                                        | +                                    | +          |
| Yakoot 2017       | +                                           | +                                       | +                                                         | +                                               | +                                        | +                                    | +          |
